# Supplementary material for: Eu3+ doped ZnAl layered double hydroxides as calibrationless, fluorescent sensors for carbonate
Source: Royal Society of Chemistry journal article supplement (doi:10.1039/d3cc03066k), 2023-01-01
Supplement: d3cc03066k1.pdf [file d3cc03066k1.pdf]

Electronic Supplementary Information (ESI) – ChemComm [D3CC03066K](#)

**Eu<sup>3+</sup> doped ZnAl layered double hydroxides as calibrationless, fluorescent sensors for carbonate**

Alysson F. Morais<sup>a,b,e,\*</sup>, Ivan G.N. Silva<sup>a</sup>, Bruno J. Ferreira<sup>a</sup>, Alexandre C. Teixeira<sup>a</sup>, Sreeprasanth P. Sree<sup>b,c</sup>, Huayna Terraschke<sup>d</sup>, Fernando A. Garcia<sup>a</sup>, Eric Breynaert<sup>b,e</sup> and Danilo Mustafa<sup>a,\*</sup>

<sup>a</sup> Instituto de Física da Universidade de São Paulo, 05508-090 – São Paulo, SP, Brazil, [dmustafa@if.usp.br](mailto:dmustafa@if.usp.br)

<sup>b</sup> Center for Surface Chemistry and Catalysis, KU Leuven, 3001, Leuven, Belgium, [alysson.morais@kuleuven.be](mailto:alysson.morais@kuleuven.be)

<sup>c</sup> Department of Materials Engineering, KU Leuven, 3001, Leuven, Belgium

<sup>d</sup> Institut für Anorganische Chemie, CAU Kiel, 24118, Kiel, Germany

<sup>e</sup> NMR/X-Ray platform for Convergence Research (NMRCoRe), KU Leuven, 3001, Leuven, Belgium

**Experimental**

**Synthesis of materials:** Eu<sup>3+</sup>-doped Zn<sup>2+</sup>/Al<sup>3+</sup> layered double hydroxides intercalated with nitrate (LDH-NO<sub>3</sub><sup>-</sup>) were prepared by coprecipitation of Zn<sup>2+</sup>, Al<sup>3+</sup> and Eu<sup>3+</sup> at constant pH. For the synthesis, a ten-millilitres aqueous solution (solution A) containing Zn(NO<sub>3</sub>)<sub>2</sub>, Al(NO<sub>3</sub>)<sub>3</sub> and Eu(NO<sub>3</sub>)<sub>3</sub> at concentrations of 0.66, 0.314 and 0.016 mol.L<sup>-1</sup>, respectively, was added dropwise (10 mL.h<sup>-1</sup>) into 200 mL of Milli-Q water (solution B). During the dosing, the pH of solution B was kept in the range 7.8-8.2 by the addition of a 1 mol.L<sup>-1</sup> NaOH solution by the automatic titrator Metrohm 785 DMP. After the end of the synthesis, the resulting slurry was aged statically for two days at 60 °C to optimize crystallization and subsequently centrifuged, rinsed with distilled water and dried in a drying oven at 60 °C for 3 days. The final solid was ground with mortar and pestle to produce a fine powder. For the synthesis of LDH-CO<sub>3</sub><sup>2-</sup>, the same procedure was repeated, but solution B comprised an aqueous solution of Na<sub>2</sub>CO<sub>3</sub> 0.5 mol.L<sup>-1</sup>.

**Anion exchange:** To exchange the nitrate originally intercalated in the LDHs, 300 mg of pristine LDH-NO<sub>3</sub> were dispersed by continuous stirring in 5 mL of a Na<sub>2</sub>CO<sub>3</sub> aqueous solutions at concentrations of 20, 40, 60, 80, 100 and 200 mmol.L<sup>-1</sup> (samples LDH-A, A = 20, 40, 60, 80, 100 and 200). The suspensions were equilibrated for 24 h and then centrifuged and washed with deionized water up to a final dilution of more than 100 times. After the final centrifugation step the product was dried at 60 °C for 3 days.

**Characterization:** Powder X-ray diffraction (PXRD) was performed in a Bruker D8 (Massachusetts, EUA) diffractometer ( $\text{CuK}\alpha$ , 1.5418 Å). For Carbon and Nitrogen (CHN) elemental analysis, a Perkin Elmer (Massachusetts, EUA) 2400 series ii elemental analyzer was used. For Zn, Al and Eu quantification, Inductively Coupled Plasma Optical Emission Spectrometry (ICP-OES) was performed with a Spectro Arcos (SPECTRO Analytical Instruments GmbH, Germany) optical spectrometer with radial view. The *ex situ* photoluminescence measurements were performed in a FS5 Spectrofluorometer (Edinburgh Instruments) spectrofluorometer with a 450 W Xenon lamp equipped with singular monochromators both at the excitation and the emission optics. All spectra shown were corrected for the intensity profile of the Xenon lamp and detection response. X-ray absorption spectroscopy (XAS) experiments were performed at the XAFS2<sup>1</sup> beamline of the Brazilian Synchrotron Light Laboratory (LNLS, Campinas, Brazil). X-ray absorption near edge structure (XANES) and extended X-ray absorption fine structure (EXAFS) were collected at the Eu L<sup>III</sup>-edge (6.9769 keV). A double-crystal Si(111) monochromator was used. The powder samples were pressed into pellets and the absorption spectra were measured in the fluorescence mode.

**In situ photoluminescence measurements:** For the in situ measurements of the luminescence properties of LDHs during anion exchange reactions, 300 mg of pristine LDH-NO<sub>3</sub> were suspended in 5 mL of a Na<sub>2</sub>CO<sub>3</sub> aqueous solutions at concentrations of 20, 100 and 200 mmol.L<sup>-1</sup>. The LDHs used in the different suspensions originated from the same batch. To follow the luminescence properties of LDHs *in situ* during the anion exchange reaction, a setup comprising an Ocean Optics USB2000 portable fluorimeter equipped with an optical fibre to monitor the emission of the sample was assembled. A commercial 10 W UV LED lamp (**Figure S2**) was used as excitation source and was placed on top of the suspension.

## Results

**Table S1.** Experimental chemical composition of pristine LDH-NO<sub>3</sub> and LDH-A (A = 20, 40, 60, 80, 100 and 200) as derived from elemental analysis.

| Sample                                   | Zn<br>wt% | Al<br>wt% | Eu<br>wt% | C<br>wt% | N<br>wt% | Empirical formula*                                                                                                                                                                                    |
|------------------------------------------|-----------|-----------|-----------|----------|----------|-------------------------------------------------------------------------------------------------------------------------------------------------------------------------------------------------------|
| <b>ZnAlEu-NO<sub>3</sub><sup>-</sup></b> | 36.4      | 7.66      | 1.82      | 0.34     | 3.42     | [Zn <sub>1.9</sub> Al <sub>0.96</sub> Eu <sub>0.040</sub> (OH) <sub>5.8</sub> ][(NO <sub>3</sub> <sup>-</sup> ) <sub>0.82</sub> (CO <sub>3</sub> <sup>2-</sup> ) <sub>0.09</sub> ]· nH <sub>2</sub> O |
| <b>LDH-20</b>                            | 36.3      | 7.56      | 1.60      | 0.95     | 2.20     | [Zn <sub>1.9</sub> Al <sub>0.96</sub> Eu <sub>0.036</sub> (OH) <sub>5.8</sub> ][(NO <sub>3</sub> <sup>-</sup> ) <sub>0.54</sub> (CO <sub>3</sub> <sup>2-</sup> ) <sub>0.27</sub> ]· nH <sub>2</sub> O |
| <b>LDH-40</b>                            | 37.6      | 7.91      | 1.76      | 1.22     | 1.50     | [Zn <sub>1.9</sub> Al <sub>0.96</sub> Eu <sub>0.038</sub> (OH) <sub>5.8</sub> ][(NO <sub>3</sub> <sup>-</sup> ) <sub>0.35</sub> (CO <sub>3</sub> <sup>2-</sup> ) <sub>0.33</sub> ]· nH <sub>2</sub> O |
| <b>LDH-60</b>                            | 39.2      | 8.45      | 1.99      | 1.68     | 0.25     | [Zn <sub>1.9</sub> Al <sub>0.96</sub> Eu <sub>0.040</sub> (OH) <sub>5.7</sub> ][(NO <sub>3</sub> <sup>-</sup> ) <sub>0.05</sub> (CO <sub>3</sub> <sup>2-</sup> ) <sub>0.43</sub> ]· nH <sub>2</sub> O |
| <b>LDH-80</b>                            | 39.0      | 8.16      | 1.88      | 1.86     | 0.18     | [Zn <sub>1.9</sub> Al <sub>0.96</sub> Eu <sub>0.039</sub> (OH) <sub>5.8</sub> ][(NO <sub>3</sub> <sup>-</sup> ) <sub>0.04</sub> (CO <sub>3</sub> <sup>2-</sup> ) <sub>0.49</sub> ]· nH <sub>2</sub> O |
| <b>LDH-100</b>                           | 39.4      | 8.28      | 1.86      | 2.20     | 0.005    | [Zn <sub>1.9</sub> Al <sub>0.96</sub> Eu <sub>0.038</sub> (OH) <sub>5.8</sub> ][(CO <sub>3</sub> <sup>2-</sup> ) <sub>0.57</sub> ]· nH <sub>2</sub> O                                                 |
| <b>LDH-200</b>                           | 39.2      | 8.36      | 1.89      | 2.02     | 0.055    | [Zn <sub>1.9</sub> Al <sub>0.96</sub> Eu <sub>0.039</sub> (OH) <sub>5.7</sub> ][(NO <sub>3</sub> <sup>-</sup> ) <sub>0.01</sub> (CO <sub>3</sub> <sup>2-</sup> ) <sub>0.52</sub> ]· nH <sub>2</sub> O |

\* The NO<sub>3</sub><sup>-</sup> stoichiometry in LDH-100 is lower than 0.002 and has not been shown.

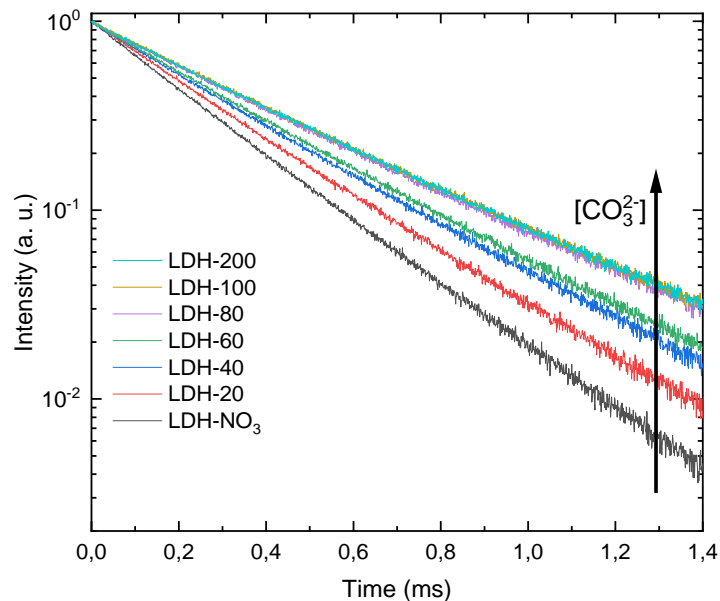

**Figure S1.** Luminescence decay curves monitored on the  $(\text{Eu}^{3+})^5\text{D}_0 \rightarrow ^7\text{F}_2$  emission band after direct excitation of the  $\text{Eu}^{3+}$  activators (394 nm).

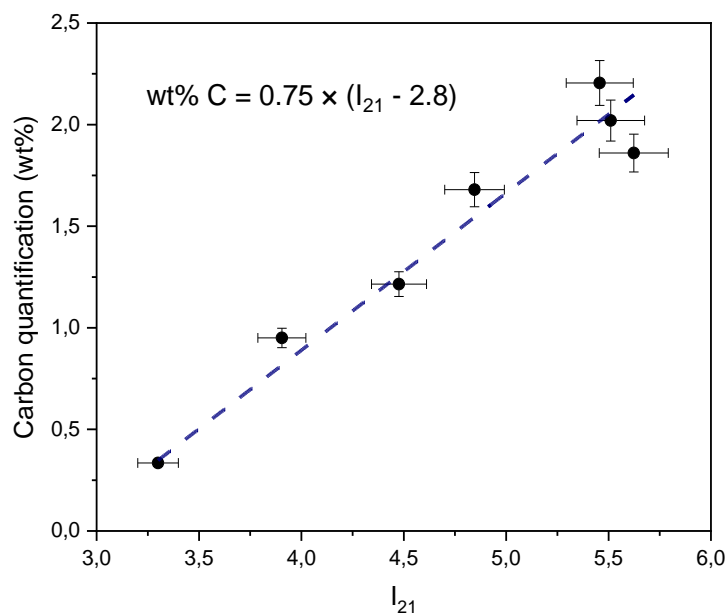

**Figure S2.** Calibration data for carbon quantification in the LDHs as a function of the  $I_{21} = I(^5\text{D}_0 \rightarrow ^7\text{F}_2) / I(^5\text{D}_0 \rightarrow ^7\text{F}_1)$  luminescence ratio.

**Table S2.** Luminescence decay lifetime of the  $(\text{Eu}^{3+})^5\text{D}_0 \rightarrow ^7\text{F}_1$  transition in the LDH samples after direct excitation of  $\text{Eu}^{3+}$  at 394 nm.

| Sample             | Lifetime (ms) | Goodness of the fit (R-squared) |
|--------------------|---------------|---------------------------------|
| LDH- $\text{NO}_3$ | 0.246(3)      | 0.99984                         |
| LDH-20             | 0.281(3)      | 0.99977                         |
| LDH-40             | 0.320(3)      | 0.99970                         |
| LDH-60             | 0.336(3)      | 0.99971                         |
| LDH-80             | 0.382(3)      | 0.99959                         |
| LDH-100            | 0.391(3)      | 0.99997                         |
| LDH-200            | 0.392(3)      | 0.99966                         |

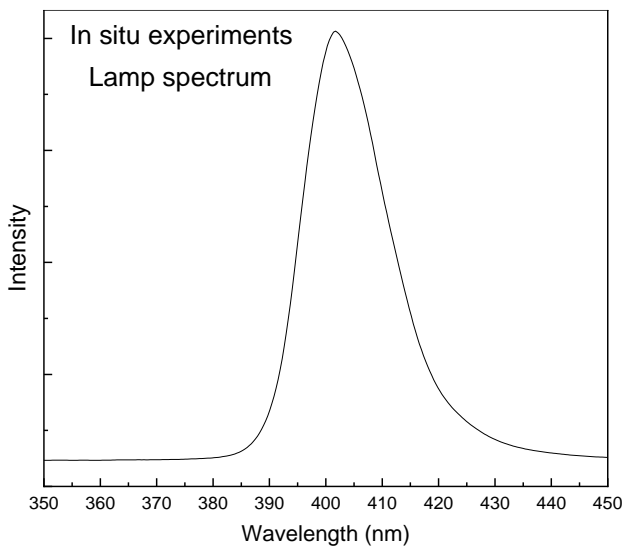

**Figure S3.** Spectrum of the UV lamp used as excitation source for the *in situ* PL measurements.

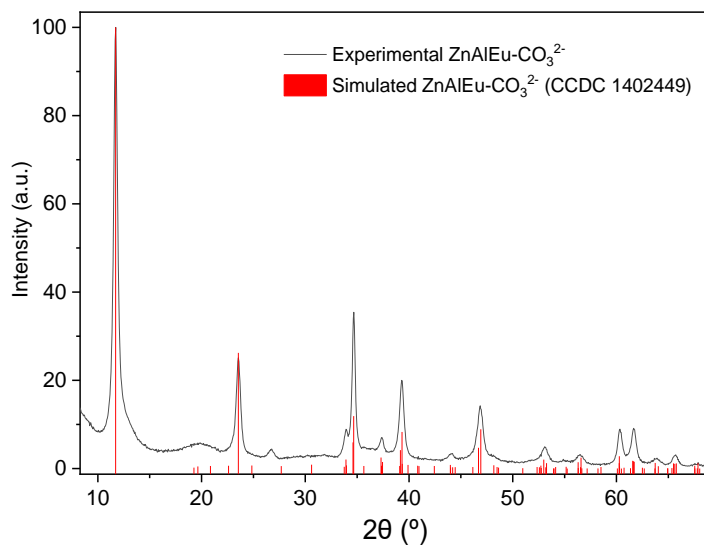

**Figure S3.** PXRD pattern of  $\text{LDH-CO}_3^{2-}$  and comparison to a reference structure (CCDC 1402449) of a ZnAl LDH intercalated with carbonate as shown on Ref.<sup>2</sup>.

**EXFAS data analysis:** For the EXAFS data analysis, an amplitude reduction factor  $S_0^2 = 0.95 \pm 0.11$  has been obtained from ab-initio calculations<sup>3</sup> using the FEFF8.4 code<sup>4</sup> for the model compound  $\text{Eu}_2\text{O}_3$  (cubic phase<sup>5</sup>, coordination number = 6, see Ref. <sup>6</sup>). Chemical transferability has been assumed and this amplitude factor was used in the analysis of the LDH samples. The Demeter platform<sup>7</sup> has been used to model and fit the EXAFS data. Crystallographic information from layered Europium hydroxides<sup>8</sup>, assumed to be crystal analogs for the local environment of  $\text{Eu}^{3+}$  in the LDHs, were used as input for the calculations implemented along with IFEFFIT. The coordination of  $\text{Eu}^{3+}$  in LDH- $\text{NO}_3$  and LDH- $\text{CO}_3$  as derived from the fitting of the  $\text{Eu}^{3+}$  L<sup>III</sup>-edge EXAFS data (**Figure S4**) is summarized on **Table S3**. Detailed inspection of the Fourier transformed EXAFS spectra for each coordination shell observed in the spectra revealed no evidence of high-Z backscatterers in the near coordination environment of  $\text{Eu}^{3+}$ , excluding the presence of Eu segregation in Eu-rich side phases in both samples. In LDH- $\text{NO}_3$ , Europium is surrounded by 7 Oxygen atoms at 2.42 Å, 1 Oxygen atom at 3.03 Å, 4 Oxygen atom at 3.57 Å and 6 Zn atoms at 4.00 Å. The 6-fold Zn coordination shell observed at 4.0 Å is in full accordance with  $\text{Eu}^{3+}$  being built into the hydroxide layers of the LDH structure. A similar coordination structure is observed for Europium in LDH- $\text{CO}_3$ ,  $\text{Eu}^{3+}$  being surrounded by 7 Oxygen atoms at 2.32 Å, 1 Oxygen atom at 2.84 Å (this one shorter than that in LDH- $\text{NO}_3$ ), 5(2) Oxygen atom at 3.63 Å and 6 Zn atoms at 3.93 Å. Also for LDH- $\text{CO}_3$  the proximity to the Zn atoms in the hydroxide layers indisputably shows  $\text{Eu}^{3+}$  to be replacing  $\text{Al}^{3+}$  in the hydroxide layers.

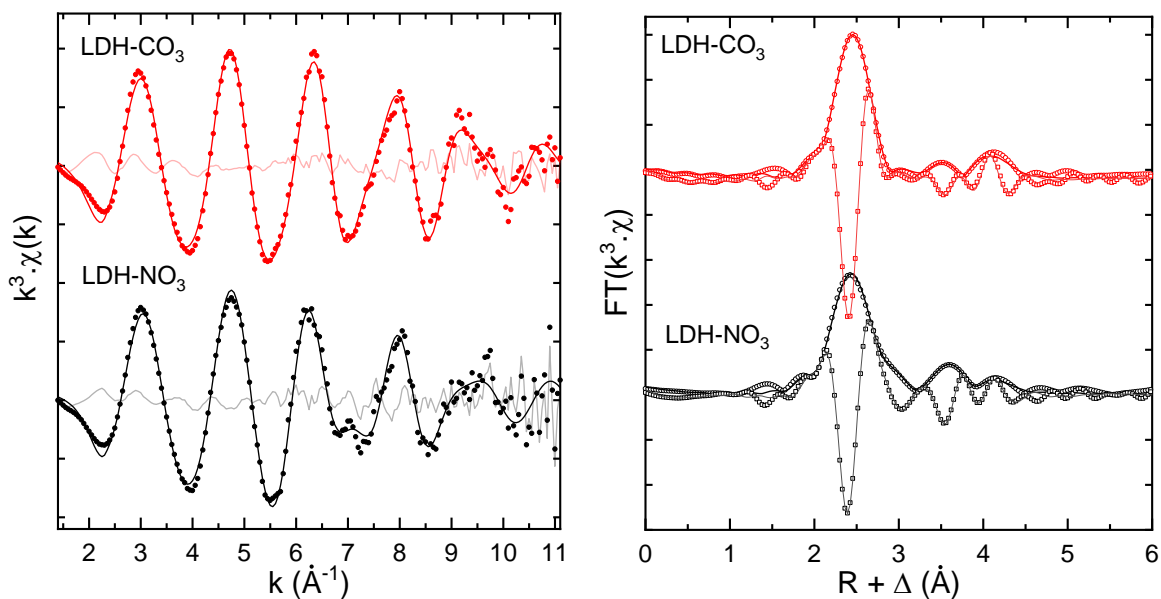

**Figure S4.** Eu L<sup>III</sup>-edge EXAFS spectra (left) and phase-corrected Fourier transform (right) of LDH- $\text{NO}_3$  and LDH- $\text{CO}_3$ . The data (circles), fits (solid lines) and residuals (faint lines) are shown with matching colors for each sample.

**Table S3.** Fit parameters from the Eu L<sup>III</sup>-edge EXAFS data\*.

| Path                                  | N <sup>A</sup> | R (Å) <sup>B</sup> | σ <sup>2</sup> (Å <sup>2</sup> ) <sup>C</sup> |
|---------------------------------------|----------------|--------------------|-----------------------------------------------|
| <b>LDH-NO<sub>3</sub><sup>D</sup></b> |                |                    |                                               |
| Eu-O                                  | 7.4(3)         | 2.422(5)           | 0.0104(7)                                     |
| Eu-O                                  | 1(fixed)       | 3.03(3)            | 0.013(4)                                      |
| Eu-O                                  | 3.8(5)         | 3.569(6)           | 0.0083(24)                                    |
| Eu-Zn                                 | 6 (fixed)      | 4.00(1)            | 0.0216(12)                                    |
| <b>LDH-CO<sub>3</sub><sup>E</sup></b> |                |                    |                                               |
| Eu-O                                  | 7.6(4)         | 2.434(2)           | 0.0088(6)                                     |
| Eu-O                                  | 1(fixed)       | 2.84(1)            | 0.0037(16)                                    |
| Eu-O                                  | 5(2)           | 3.631(3)           | 0.019(7)                                      |
| Eu-Zn                                 | 6 (fixed)      | 3.93(1)            | 0.0178(13)                                    |

\* Uncertainties are given in parentheses. An amplitude reduction factor  $S_0^2 = 0.95$  was determined from a Eu<sub>2</sub>O<sub>3</sub> reference. The k fitting range is 1.5-11 Å<sup>-1</sup>. The R fitting range is 0.9-4.1 Å. <sup>A</sup> Coordination number. <sup>B</sup> Bond distance. <sup>C</sup> Debye-Waller factor. <sup>D</sup> Energy shift parameter ΔE = (3.5 ± 0.2) eV, R-factor = 0.25%. <sup>E</sup> Energy shift parameter ΔE = (3.5 ± 0.2) eV, R-factor = 0.40%.

## References

- 1 S. J. A. Figueroa, J. C. Mauricio, J. Murari, D. B. Beniz, J. R. Piton, H. H. Slepicka, M. F. De Sousa, A. M. Espíndola and A. P. S. Levinsky, *J. Phys. Conf. Ser.*, 2016, **712**, 12022.
- 2 S. Marappa and P. V. Kamath, *Ind. Eng. Chem. Res.*, 2015, **54**, 11075–11079.
- 3 I. G. N. Silva, A. F. Morais, B. C. Lima, F. A. Garcia and D. Mustafa, *Appl. Clay Sci.*, 2020, **199**, 105861.
- 4 J. J. Rehr and R. C. Albers, *Rev. Mod. Phys.*, 2000, **72**, 621–654.
- 5 Z. K. Heiba, Y. Akin, W. Sigmund and Y. S. Hascicek, *J. Appl. Crystallogr.*, 2003, **36**, 1411–1416.
- 6 A. F. Morais, I. G. N. Silva, B. C. Lima, F. A. Garcia and D. Mustafa, *ACS Omega*, 2020, **5**, 23778–23785.
- 7 B. Ravel and M. Newville, *J. Synchrotron Radiat.*, 2005, **12**, 537–541.
- 8 F. Geng, H. Xin, Y. Matsushita, R. Ma, M. Tanaka, F. Izumi, N. Iyi and T. Sasaki, *Chem. - A Eur. J.*, 2008, **14**, 9255–9260.
